# Supplementary material for: Intensified lentiviral vector perfusion bioprocessing with a spiral inertial microfluidic cell retention device
Source: Royal Society of Chemistry journal article supplement (doi:10.1039/d6lc00029k), 2026-03-11
Supplement: d6lc00029k1.xlsx [file d6lc00029k1.xlsx]

## Sheet: Run 1 Process Data
Date & Time	Sample ID	Gln	Glu	Gluc	Lac	NH4+	Na+	K+	Ca++	pH	PO2	PCO2	Total Density	Viable Density	Viability	Avg. Live Diameter	Total Live Count	Total Cell Count	Live Cell Std. Deviation
12/2/2024 20:20:10	241202_3E9_BAT_D0	3.82	3.59	6.29	0.03	0.28	107.8	8.72	0.14	7.653	167.7	28.7
12/2/2024 20:22:32	241202_3E9_BAT_D0	3.81	3.57	6.28	0.04	0.27	106.4	8.66	0.13	7.656	164.5	33.1
12/2/2024 20:24:59	241202_3E9_BAT_D0												0.699	0.638	91.3	19.43	378	414	2.87
12/2/2024 20:29:47	241202_3E9_BAT_D0												0.579	0.549	94.8	19.07	325	343	2.73
12/2/2024 20:34:22	241202_3E9_BAT_D0												0.721	0.697	96.7	19.11	413	427	2.68
12/2/2024 21:42:16	241202_3E9_BAT_D0	3.81	3.58	6.25	0.07	0.32	106.4	8.66	0.14	7.689	114.6	25.3
12/2/2024 21:57:00	241202_3E9_BAT_D0	3.89	3.63	6.31	0.09	0.33	108.2	8.8	0.14	7.657	144.1	29.4
12/2/2024 22:02:11	241202_3E9_BAT_D0	3.82	3.59	6.3	0.07	0.33	108.5	8.83	0.14	7.6	148.5	33.5
12/3/2024 19:27:30	241202_3E9_BAT_D1	2.95	3.58	5.17	0.97	0.96	116.1	8.65	0.15	7.476	103.6	51.4
12/3/2024 19:29:50	241202_3E9_BAT_D1	2.94	3.54	5.1	0.96	0.96	115.7	8.63	0.15	7.491	113.7	51.1
12/3/2024 19:32:05	241202_3E9_BAT_D1												1.271	1.226	96.4	20.63	726	753	3.18
12/3/2024 19:36:31	241202_3E9_BAT_D1												1.148	1.114	97.1	20.36	660	680	3.15
12/3/2024 19:41:06	241202_3E9_BAT_D1												1.092	1.074	98.3	20.67	636	647	3.35
12/3/2024 20:50:08	241202_3E9_BAT_D1	2.9	3.61	5.08	1.04	0.98	115.6	8.58	0.15	7.393	105.4	63.4
12/3/2024 21:21:00	241202_3E9_BAT_D1	2.95	3.68	5.14	1.1	0.97	118.7	8.78	0.15	7.249	106.4	89.8
12/3/2024 21:34:13	241202_3E9_BAT_D1												1.243	1.204	96.9	20.59	713	736	3.11
12/4/2024 9:10:31	241202_3E9_BAT_D2	2.45	3.59	4.35	1.57	1.09	117	8.45	0.15	7.222	102.8	77.3
12/4/2024 9:12:50	241202_3E9_BAT_D2												1.455	1.405	96.5	20.56	832	862	3.22
12/4/2024 9:17:48	241202_3E9_BAT_D2												1.504	1.472	97.9	20.59	872	891	3.64
12/4/2024 17:32:43	241202_3E9_BAT_D2	2.11	3.63	3.99	1.85	1.22	116.9	8.4	0.16	7.229	104.5	62.9
12/4/2024 17:35:06	241202_3E9_BAT_D2	2.11	3.57	3.98	1.86	1.25	119.1	8.52	0.16	7.255	112.2	59.2
12/4/2024 17:37:28	241202_3E9_BAT_D2												1.957	1.916	97.9	20.47	1135	1159	3.65
12/4/2024 17:42:47	241202_3E9_BAT_D2												1.682	1.66	98.7	20.42	983	996	3.76
12/4/2024 17:47:34	241202_3E9_BAT_D2												1.607	1.589	98.8	20.18	941	952	4.35
12/5/2024 10:54:07	241202_3E9_BAT_D3	1.69	3.47	3.45	1.87	1.37	117.1	8.45	0.18	7.24	101.8	49.3
12/5/2024 10:56:22	241202_3E9_BAT_D3	1.68	3.42	3.43	1.87	1.36	116.4	8.38	0.18	7.261	108.1	50.5
12/5/2024 10:59:36	241202_3E9_BAT_D3												1.915	1.805	94.3	19.98	1069	1134	3.66
12/5/2024 11:04:00	241202_3E9_BAT_D3												1.953	1.877	96.1	19.95	1112	1157	3.92
12/5/2024 11:08:47	241202_3E9_BAT_D3												2.073	2.012	97.1	19.98	1192	1228	3.98
12/6/2024 11:05:10	241202_3E9_PER_D1	1.98	3.63	3.54	1.78	1.01	110.2	8.33	0.17	7.252	100.7	36.6
12/6/2024 11:07:38	241202_3E9_PER_D1	1.99	3.57	3.56	1.79	1.04	111.7	8.43	0.17	7.268	106.5	38.3
12/6/2024 11:09:53	241202_3E9_PER_D1
12/6/2024 11:11:13	241202_3E9_PER_D1												4.494	3.691	82.1	19.55	2186	2662	2.39
12/6/2024 11:16:04	241202_3E9_PER_D1												4.418	3.571	80.8	19.56	2115	2617	2.39
12/6/2024 11:22:49	241202_3E9_PER_D1												4.444	3.62	81.5	19.56	2144	2632	2.43
12/6/2024 11:35:51	241202_3E9_PER_D1_HARV_BOT												0.029	0.014	47.1	18.55	8	17	1.15
12/6/2024 11:40:35	241202_3E9_PER_D1_HARV_BOT												0.02	0.007	33.3	18.12	4	12	0.21
12/6/2024 11:46:18	241202_3E9_PER_D1_HARV_BOT												0.029	0.005	17.6	18.53	3	17	1.81
12/7/2024 14:54:27	241202_3E9_PER_D2	2.16	3.75	3.58	1.88	0.96	107.9	8.33	0.18	7.322	96.8	12.3
12/7/2024 14:56:50	241202_3E9_PER_D2												8.207	6.64	80.9	19.55	3933	4861	2.07
12/7/2024 15:01:43	241202_3E9_PER_D2	2.16	3.65	3.55	1.87	0.97	107.7	8.27	0.18	7.305	97	12.8
12/7/2024 15:04:13	241202_3E9_PER_D2												8.274	6.784	82	19.66	4018	4901	2.08
12/7/2024 15:08:38	241202_3E9_PER_D2												7.994	6.505	81.4	19.63	3853	4735	2.16
12/7/2024 15:13:32	241202_3E9_PER_D2_HARV_BOT												0.047	0.014	28.6	18.44	8	28	0.58
12/7/2024 15:18:08	241202_3E9_PER_D2_HARV_BOT												0.056	0.025	45.5	17.79	15	33	2.14
12/7/2024 15:24:48	241202_3E9_PER_D2_HARV_BOT												0.051	0.019	36.7	18.11	11	30	3.16
12/8/2024 15:06:12	241202_3E9_PER_D3	1.92	3.67	3.21	1.97	0.97	106.5	8.16		7.266	95.1	4.5
12/8/2024 15:08:43	241202_3E9_PER_D3	1.95	3.68	3.24	2.04	0.99	108.9	8.3		7.257	91.5	5.4
12/8/2024 15:12:28	241202_3E9_PER_D3												11.106	9.382	84.5	19.2	5557	6578	2.28
12/8/2024 15:16:46	241202_3E9_PER_D3												11.209	9.374	83.6	19.44	5552	6639	2.29
12/8/2024 15:21:22	241202_3E9_PER_D3												11.108	9.328	84	19.72	5525	6579	2.27
12/8/2024 15:27:03	241202_3E9_PER_D3_HARV_BOT												0.115	0.024	20.6	18.36	14	68	1.11
12/8/2024 15:31:45	241202_3E9_PER_D3_HARV_BOT												0.116	0.035	30.4	19	21	69	1.7
12/8/2024 15:36:08	241202_3E9_PER_D3_HARV_BOT												0.093	0.022	23.6	16.73	13	55	3.11
12/8/2024 15:43:14	241202_3E9_PER_D3	2	3.73	3.29	2.02	0.99	109.9	8.33		7.216	96	7.1
12/8/2024 15:46:18	241202_3E9_PER_D3	1.96	3.64	3.26	2	0.99	108.4	8.22		7.227	85.3	7.3
12/8/2024 17:24:23	241202_3E9_PER_D3	2.03	3.63	3.33	1.88	0.94	106.9	8.07		6.901	98.6	46
12/9/2024 1:04:18	241202_3E9_PER_D4	2.18	3.49	3.51	1.6	0.97	105.8	8.08		7.122	96.9	34.2
12/9/2024 1:06:36	241202_3E9_PER_D4												11.145	9.129	81.9	19.79	5299	6469	2.18
12/9/2024 1:10:52	241202_3E9_PER_D4												12.305	10.297	83.7	19.59	6099	7288	2.12
12/9/2024 1:15:26	241202_3E9_PER_D4												12.163	10.133	83.3	19.6	6002	7204	2.14
12/9/2024 15:48:32	241202_3E9_PER_D4	2.18	3.61	3.5	1.69	1.04	107.4	8.19		7.152	96.8	28.7
12/9/2024 15:50:58	241202_3E9_PER_D4	2.13	3.49	3.4	1.68	1.05	106.9	8.1		7.161	93.2	29.8
12/9/2024 15:53:37	241202_3E9_PER_D4												14.312	11.947	83.5	19.36	7076	8477	2.12
12/9/2024 16:05:54	241202_3E9_PER_D4												14.56	12.126	83.3	19.7	7182	8624	2.01
12/9/2024 16:10:33	241202_3E9_PER_D4												12.993	10.832	83.4	19.52	6416	7696	2.08
12/9/2024 16:15:22	241202_3E9_PER_D4												13.355	11.155	83.5	19.27	6607	7910	2.22
12/9/2024 16:19:39	241202_3E9_PER_D4												12.794	10.478	81.9	19.66	6206	7578	2.11
12/9/2024 16:24:46	241202_3E9_PER_D4_HARV_BOT												0.24	0.095	39.4	17.86	56	142	1.6
12/9/2024 16:29:09	241202_3E9_PER_D4_HARV_BOT												0.252	0.066	26.2	17.56	39	149	0.97
12/9/2024 16:33:25	241202_3E9_PER_D4_HARV_BOT												0.262	0.096	36.8	17.62	57	155	1.32
12/9/2024 16:41:16	241202_3E9_PER_D4												13.488	11.226	83.2	19.33	6649	7989	2.08
12/9/2024 16:45:33	241202_3E9_PER_D4												13.794	11.437	82.9	19.35	6774	8170	2.13
12/10/2024 18:21:16	241202_3E9_PER_D5	2.24	3.77	2.78	2.09	1.22	106.1	8.1		7.141	95	5.2
12/10/2024 18:24:15	241202_3E9_PER_D5	2.23	3.72	2.8	2.13	1.25	107.8	8.21		7.142	88	5.9
12/10/2024 18:26:17	241202_3E9_PER_D5												17.442	14.737	84.5	18.77	8729	10331	2.06
12/10/2024 18:30:49	241202_3E9_PER_D5												16.74	14.283	85.3	18.81	8460	9915	2.1
12/10/2024 18:35:06	241202_3E9_PER_D5												16.549	14.025	84.7	18.97	8307	9802	2.17
12/10/2024 18:39:31	241202_3E9_PER_D5												16.944	14.489	85.5	19.09	8582	10036	2.17
12/10/2024 18:44:21	241202_3E9_PER_D5												16.877	14.315	84.8	19.36	8479	9996	2.22
12/10/2024 18:49:33	241202_3E9_PER_D5_HARV_BOT												0.485	0.231	47.7	17.3	137	287	1.85
12/10/2024 18:57:18	241202_3E9_PER_D5_HARV_BOT												0.51	0.231	45.4	17.62	137	302	1.72
12/10/2024 19:02:21	241202_3E9_PER_D5_HARV_BOT												0.481	0.23	47.7	17.83	136	285	1.73
12/10/2024 19:07:21	241202_3E9_PER_D5												17.942	15.222	84.8	19.76	9016	10627	2.32
12/10/2024 19:12:35	241202_3E9_PER_D5												17.938	15.043	83.9	19.44	8910	10625	2.21
12/10/2024 19:17:35	241202_3E9_PER_D5												17.915	15.063	84.1	19.5	8922	10611	2.26
12/11/2024 17:30:47	241202_3E9_PER_D6	4.19	3.47	4.35	1.38	1.13	108.1	8.74		7.278	103.1	31.9
12/11/2024 17:32:56	241202_3E9_PER_D6	4.2	3.43	4.34	1.38	1.16	108.9	8.81		7.299	112.5	29.6
12/11/2024 17:35:01	241202_3E9_PER_D6												9.782	8.123	83	18.68	4811	5794	1.99
12/11/2024 17:40:04	241202_3E9_PER_D6												10.108	8.42	83.3	18.72	4987	5987	1.99
12/11/2024 17:45:06	241202_3E9_PER_D6												10.358	8.666	83.7	18.87	5133	6135	1.99
12/11/2024 17:50:10	241202_3E9_PER_D6_HARV_BOT												0.371	0.245	65.9	18.38	145	220	1.64
12/11/2024 17:55:19	241202_3E9_PER_D6_HARV_BOT												0.378	0.24	63.4	18.58	142	224	1.58
12/11/2024 18:02:22	241202_3E9_PER_D6_HARV_BOT												0.392	0.263	67.2	18.33	156	232	1.64
12/11/2024 18:07:24	241202_3E9_PER_D6_SHAKE												9.774	8.386	85.8	19.65	4967	5789	2.59
12/11/2024 18:12:29	241202_3E9_PER_D6_SHAKE												9.691	8.448	87.2	19.4	5004	5740	2.68
12/11/2024 18:17:31	241202_3E9_PER_D6_SHAKE												9.45	8.227	87.1	19.48	4873	5597	2.73
12/11/2024 18:22:41	241202_3E9_PER_D6_HARV_LINE												0.387	0.277	71.6	18.31	164	229	1.83
12/11/2024 18:27:43	241202_3E9_PER_D6_HARV_LINE												0.321	0.243	75.8	18.14	144	190	1.82
12/11/2024 18:32:47	241202_3E9_PER_D6_HARV_LINE												0.36	0.265	73.7	18.53	157	213	1.93
12/12/2024 18:09:20	241202_3E9_PER_D7	4.7	3.63	4.39	1.46	1.15	114.4	8.86		7.307	105.1	28.4
12/12/2024 18:13:52	241202_3E9_PER_D7	4.71	3.6	4.39	1.47	1.15	114.6	8.87		7.322	114.7	26.9
12/12/2024 18:15:58	241202_3E9_PER_D7												8.044	6.752	83.9	18.29	3839	4574	1.94
12/12/2024 18:21:01	241202_3E9_PER_D7												8.178	6.853	83.8	18.02	4059	4844	1.9
12/12/2024 18:26:08	241202_3E9_PER_D7												8.192	6.868	83.8	18.28	4068	4852	1.97
12/12/2024 18:31:10	241202_3E9_PER_D7_HARV_BOT												0.336	0.208	61.8	18.15	123	199	1.93
12/12/2024 18:36:21	241202_3E9_PER_D7_HARV_BOT												0.302	0.211	69.8	18.35	125	179	1.8
12/12/2024 18:41:24	241202_3E9_PER_D7_HARV_BOT												0.299	0.211	70.6	18.23	125	177	1.75
12/12/2024 18:46:30	241202_3E9_PER_D7_SHAKE												8.578	7.599	88.6	19.29	4501	5081	2.58
12/12/2024 18:51:33	241202_3E9_PER_D7_SHAKE												8.808	7.849	89.1	19.2	4649	5217	2.68
12/12/2024 18:56:44	241202_3E9_PER_D7_SHAKE												9.112	8.047	88.3	19.31	4766	5397	2.58
12/12/2024 19:03:30	241202_3E9_PER_D7_HARV_LINE												0.274	0.223	81.5	18.18	132	162	1.74
12/12/2024 19:08:38	241202_3E9_PER_D7_HARV_LINE												0.216	0.162	75	17.77	96	128	1.8
12/12/2024 19:13:42	241202_3E9_PER_D7_HARV_LINE												0.219	0.177	80.8	18.02	105	130	1.82
12/13/2024 13:36:35	241202_3E9_PER_D8	4.98	3.52	4.83	1.15		115.6	9
12/13/2024 13:40:31	241202_3E9_PER_D8	4.98	3.53	4.86	1.17		116	9.08
12/13/2024 13:42:45	241202_3E9_PER_D8												7.187	6.085	84.7	17.44	3604	4257	2.01
12/13/2024 13:48:16	241202_3E9_PER_D8												7.307	6.183	84.6	17.72	3662	4328	1.87
12/13/2024 13:53:30	241202_3E9_PER_D8												7.086	6.01	84.8	17.62	3560	4197	1.96
12/13/2024 13:58:48	241202_3E9_PER_D8_HARV_BOT												0.13	0.086	66.2	17.13	51	77	1.5
12/13/2024 14:06:00	241202_3E9_PER_D8_HARV_BOT												0.15	0.111	74.2	17.32	66	89	1.6
12/13/2024 14:11:20	241202_3E9_PER_D8_HARV_BOT												0.138	0.095	68.3	17.97	56	82	1.85
12/13/2024 14:16:35	241202_3E9_PER_D8_SHAKE												8.469	7.435	87.8	19.34	4404	5016	2.74
12/13/2024 14:21:55	241202_3E9_PER_D8_SHAKE												8.965	8.021	89.5	19.1	4751	5310	2.87
12/13/2024 14:27:29	241202_3E9_PER_D8_SHAKE												8.794	7.8	88.7	19.22	4620	5209	2.82
12/13/2024 14:32:48	241202_3E9_PER_D8_HARV_LINE												0.069	0.041	58.5	17.32	24	41	0.99
12/13/2024 14:38:02	241202_3E9_PER_D8_HARV_LINE												0.083	0.066	79.6	17.6	39	49	2.12
12/13/2024 14:43:21	241202_3E9_PER_D8_HARV_LINE												0.081	0.051	62.5	16.35	30	48	1.32
12/14/2024 12:26:01	241202_3E9_PER_D9	5.2	3.66	5.26	0.9		115.2	9.04
12/14/2024 12:28:42	241202_3E9_PER_D9	5.19	3.56	5.23	0.9		115	9.02
12/14/2024 12:30:56	241202_3E9_PER_D9												5.089	4.251	83.5	17.2	2518	3014	1.95
12/14/2024 12:36:12	241202_3E9_PER_D9												5.386	4.748	88.2	16.51	2812	3190	2.11
12/14/2024 12:41:47	241202_3E9_PER_D9												5.119	4.457	87.1	16.85	2640	3032	1.96
12/14/2024 12:47:02	241202_3E9_PER_D9_HARV_BOT												0.091	0.064	70.4	17.31	38	54	1.91
12/14/2024 12:52:26	241202_3E9_PER_D9_HARV_BOT												0.073	0.051	69.8	17.32	30	43	1.71
12/14/2024 12:57:42	241202_3E9_PER_D9_HARV_BOT												0.078	0.035	45.7	16.61	21	46	1.81
12/14/2024 13:03:17	241202_3E9_PER_D9_SHAKE												8.408	7.24	86.1	19.2	4288	4980	3
12/14/2024 13:08:33	241202_3E9_PER_D9_SHAKE												7.756	6.622	85.4	19.07	3922	4594	3.01
12/14/2024 13:13:58	241202_3E9_PER_D9_SHAKE												8.428	7.27	86.3	18.97	4306	4992	3.11
12/14/2024 13:19:15	241202_3E9_PER_D9_HARV_LINE												0.059	0.037	62.9	17.24	22	35	1.47
12/14/2024 13:24:49	241202_3E9_PER_D9_HARV_LINE												0.044	0.027	61.5	15.97	16	26	1.75
12/14/2024 13:30:06	241202_3E9_PER_D9_HARV_LINE												0.051	0.035	70	16.13	21	30	1.66
12/15/2024 13:13:57	241202_3E9_PER_D10	5.62	3.64	5.33	0.9	0.83	117.3	9.2	0.13
12/15/2024 13:17:25	241202_3E9_PER_D10	5.43	3.55	5.26	0.88	0.82	115.2	9.05	0.12
12/15/2024 13:19:39	241202_3E9_PER_D10												4.325	3.392	78.4	16.4	2009	2562	2.06
12/15/2024 13:25:15	241202_3E9_PER_D10												4.246	3.394	79.9	16.3	2010	2515	2.08
12/15/2024 13:30:37	241202_3E9_PER_D10												4.403	3.483	79.1	16.27	2063	2608	2.16
12/15/2024 13:35:56	241202_3E9_PER_D10_HARV_BOT												0.024	0.014	57.1	16.76	8	14	1.55
12/15/2024 13:41:22	241202_3E9_PER_D10_HARV_BOT												0.042	0.014	32	16.63	8	25	2.49
12/15/2024 13:46:59	241202_3E9_PER_D10_HARV_BOT												0.022	0.008	38.5	16.03	5	13	1.96
12/15/2024 13:52:20	241202_3E9_PER_D10_SHAKE												6.757	4.898	72.5	19.43	2785	3842	2.96
12/15/2024 13:57:50	241202_3E9_PER_D10_SHAKE												6.804	5.192	76.3	19.44	3075	4030	2.94
12/15/2024 14:05:07	241202_3E9_PER_D10_SHAKE												7.202	5.399	75	19.41	3198	4266	2.84
12/15/2024 14:10:25	241202_3E9_PER_D10_SHAKE	5.42	3.91	5.53	0.72	1.5	122.9	9.53	0.13
12/15/2024 14:29:58	241202_3E9_PER_D10_HARV_LINE												0.078	0.025	32.6	16.8	15	46	2.49
12/15/2024 14:35:14	241202_3E9_PER_D10_HARV_LINE												0.064	0.03	47.4	15.76	18	38	0.99
12/15/2024 14:40:26	241202_3E9_PER_D10_HARV_LINE												0.047	0.019	39.3	15.94	11	28	1.6

## Sheet: Run 2 Process Data
Date & Time	Sample ID	Gln	Glu	Gluc	Lac	NH4+	Na+	K+	Ca++	pH	PO2	PCO2	Total Density	Viable Density	Viability	Avg. Live Diameter	Total Live Count	Total Cell Count	Live Cell Std. Deviation
10/1/2023 18:47:37	231001_3E9_BAT_D0	3.96	3.62	6.46	0.02	0.47	110.2	9.34	0.12	7.645	178.2	38.1
10/1/2023 18:49:56	231001_3E9_BAT_D0	3.88	3.6	6.53	0.02	0.5	110.4	9.36	0.12	7.646	169.5	34.1
10/1/2023 18:52:03	231001_3E9_BAT_D0												0.519	0.475	91.5	19.1	226	247	2.64
10/1/2023 18:57:32	231001_3E9_BAT_D0												0.519	0.441	85	19.34	210	247	2.51
10/1/2023 19:02:56	231001_3E9_BAT_D0												0.466	0.416	89.2	18.92	198	222	2.58
10/2/2023 20:03:36	231001_3E9_BAT_D1	3.21	3.64	5.86	0.58	1.05	111.3	9.56	0.12	7.161	109.5	124.9
10/2/2023 20:05:54	231001_3E9_BAT_D1	3.18	3.63	5.89	0.59	1.09	113.4	9.73	0.12	7.188	126.9	64.8
10/2/2023 20:08:01	231001_3E9_BAT_D1												0.722	0.657	91	19.98	313	344	2.79
10/2/2023 20:13:31	231001_3E9_BAT_D1												0.741	0.659	89	20.07	314	353	2.64
10/2/2023 20:18:57	231001_3E9_BAT_D1												0.748	0.704	94.1	20.12	335	356	3.19
10/3/2023 21:19:45	231001_3E9_BAT_D2	2.04	4.18	4.64	1.61	1.42	110.3	9.36	0.14	7.261	102.1	23.4
10/3/2023 21:22:03	231001_3E9_BAT_D2	1.92	4.14	4.59	1.61	1.45	111.3	9.43	0.14	7.25	114.1	25.5
10/3/2023 21:24:11	231001_3E9_BAT_D2												1.17	1.056	90.3	19.61	503	557	3.31
10/3/2023 21:29:41	231001_3E9_BAT_D2												1.149	1	87	20.08	476	547	3.4
10/3/2023 21:35:11	231001_3E9_BAT_D2												1.332	1.199	90.1	20.15	571	634	3.26
10/4/2023 9:26:21	231001_3E9_BAT_D3	1.66	4.12	4.01	2.05	1.57	109.8	9.38	0.15	7.151	105.4	7.5
10/4/2023 9:28:45	231001_3E9_BAT_D3	1.54	4.07	3.94	2.04	1.61	111.3	9.48	0.15	7.175	121.6	15.5
10/4/2023 9:30:52	231001_3E9_BAT_D3												1.531	1.399	91.4	19.51	666	729	3.16
10/4/2023 9:36:17	231001_3E9_BAT_D3												1.693	1.527	90.2	19.88	727	806	3.27
10/4/2023 9:41:51	231001_3E9_BAT_D3												1.812	1.657	91.4	19.74	789	863	3.03
10/5/2023 9:25:59	231001_3E9_PER_D1	1.68	4.22	3.94	1.99	1.31	119.9	9.23		7.216	100.9	4.6
10/5/2023 9:28:02	231001_3E9_PER_D1	1.59	4.09	3.87	1.94	1.36	110.4	9.15		7.236	116.9	5.7
10/5/2023 9:30:09	231001_3E9_PER_D1												3.512	2.884	82.1	19.47	1373	1672	1.96
10/5/2023 9:35:40	231001_3E9_PER_D1												3.404	2.697	79.2	19.39	1284	1621	1.87
10/5/2023 9:41:07	231001_3E9_PER_D1												3.644	2.993	82.1	19.49	1425	1735	1.97
10/5/2023 9:46:42	231001_3E9_PER_D1_HARV_BOT												0.006	0.004	66.7	19.34	2	3	2.03
10/5/2023 9:52:16	231001_3E9_PER_D1_HARV_BOT												0.008	0.002	25	18.74	1	4	8
10/5/2023 9:57:46	231001_3E9_PER_D1_HARV_BOT												0.006	0.002	33.3	18.88	1	3	8
10/6/2023 20:09:38	231001_3E9_PER_D2	1.74	4.14	3.65	1.93	1.21	109.4	8.78		7.161	97.5	9.5
10/6/2023 20:11:55	231001_3E9_PER_D2	1.69	4.03	3.66	1.91	1.24	110.3	8.8		7.164	107.8	14.4
10/6/2023 20:14:01	231001_3E9_PER_D2												5.763	4.646	80.6	19.36	2212	2744	1.61
10/6/2023 20:19:34	231001_3E9_PER_D2												5.713	4.597	80.5	19.35	2189	2720	1.67
10/6/2023 20:25:01	231001_3E9_PER_D2												5.941	4.725	79.5	19.42	2250	2829	1.67
10/6/2023 20:30:31	231001_3E9_PER_D2_HARV_BOT												0.04	0.008	21.1	19.05	4	19	0.99
10/6/2023 20:36:06	231001_3E9_PER_D2_HARV_BOT												0.038	0.017	44.4	18.73	8	18	3.24
10/6/2023 20:41:37	231001_3E9_PER_D2_HARV_BOT												0.027	0.006	23.1	20.68	3	13	0.89
10/7/2023 17:11:33	231001_3E9_PER_D3	1.75	3.98	3.5	1.91	1.23	110.8	8.58		7.186	98.6	16.8
10/7/2023 17:13:51	231001_3E9_PER_D3	1.69	3.87	3.46	1.89	1.24	110.7	8.57		7.196	106.1	13
10/7/2023 17:15:58	231001_3E9_PER_D3												7.5	6.141	81.9	19.21	2924	3571	1.9
10/7/2023 17:21:35	231001_3E9_PER_D3												7.653	6.372	83.3	19.18	3034	3644	1.75
10/7/2023 17:27:03	231001_3E9_PER_D3												8.273	6.884	83.2	19.18	3278	3939	1.93
10/7/2023 17:32:35	231001_3E9_PER_D3_HARV_BOT												0.197	0.088	44.7	19.11	42	94	2.14
10/7/2023 17:38:11	231001_3E9_PER_D3_HARV_BOT												0.143	0.067	47.1	18.88	32	68	1.73
10/7/2023 17:43:43	231001_3E9_PER_D3_HARV_BOT												0.132	0.055	41.3	18.94	26	63	1.88
10/8/2023 19:13:05	231001_3E9_PER_D4	1.71	3.99	3.15	2.02	1.17	108.9	8.36		7.202	94.4	6.3
10/8/2023 19:15:31	231001_3E9_PER_D4	1.65	3.89	3.11	2	1.19	109.5	8.37		7.186	98.9	7.8
10/8/2023 19:17:38	231001_3E9_PER_D4												12.551	10.57	84.2	18.68	5033	5976	1.66
10/8/2023 19:23:06	231001_3E9_PER_D4												11.618	9.636	82.9	18.67	4588	5532	1.72
10/8/2023 19:28:44	231001_3E9_PER_D4												10.877	9.022	83	18.7	4296	5179	1.74
10/8/2023 19:34:15	231001_3E9_PER_D4_HARV_BOT												0.338	0.132	39.1	17.87	63	161	1.48
10/8/2023 19:39:52	231001_3E9_PER_D4_HARV_BOT												0.401	0.208	51.8	18.2	99	191	1.72
10/8/2023 19:45:20	231001_3E9_PER_D4_HARV_BOT												0.414	0.191	46.2	18.11	91	197	1.58
10/9/2023 15:56:57	231001_3E9_PER_D5	1.78	3.96	3.08	2.05	1.16	108.9	8.42		7.211	88.9	5.1
10/9/2023 15:59:27	231001_3E9_PER_D5	1.71	3.89	3.07	2.05	1.19	109.5	8.44		7.203	88	4.3
10/9/2023 16:03:36	231001_3E9_PER_D5												13.338	11.095	83.2	18.75	5283	6351	1.62
10/9/2023 16:09:10	231001_3E9_PER_D5												14.097	11.896	84.4	18.9	5664	6712	1.6
10/9/2023 16:14:45	231001_3E9_PER_D5												14.109	11.799	83.6	18.78	5618	6718	1.68
10/9/2023 16:20:24	231001_3E9_PER_D5_HARV_BOT												0.578	0.313	54.2	18.16	149	275	1.63
10/9/2023 16:26:05	231001_3E9_PER_D5_HARV_BOT												0.489	0.263	53.6	17.87	125	233	1.42
10/9/2023 16:31:38	231001_3E9_PER_D5_HARV_BOT												0.68	0.42	61.7	18.26	200	324	1.55
10/10/2023 19:21:24	231001_3E9_PER_D6	1.51	3.89	2.79	2.02	1.22	106.5	8.09		7.142	99.5	5.5
10/10/2023 19:24:08	231001_3E9_PER_D6	1.45	3.87	2.79	2.03	1.26	107.9	8.16		7.148	93.2	4.5
10/10/2023 19:26:22	231001_3E9_PER_D6												17.526	14.699	83.9	18.42	6999	8345	1.63
10/10/2023 19:32:00	231001_3E9_PER_D6												18.018	15.432	85.7	18.35	7348	8579	1.64
10/10/2023 19:37:40	231001_3E9_PER_D6												18.377	15.728	85.6	18.53	7489	8750	1.68
10/10/2023 19:43:15	231001_3E9_PER_D6_HARV_BOT												0.995	0.586	58.9	17.55	279	474	1.63
10/10/2023 19:48:58	231001_3E9_PER_D6_HARV_BOT												1.04	0.599	57.6	17.58	285	495	1.63
10/10/2023 19:54:28	231001_3E9_PER_D6_HARV_BOT												1.092	0.678	62.1	17.67	323	520	1.38
10/11/2023 18:06:46	231001_3E9_PER_D7	2.89	3.91	4.51	1.18	1.1	108.5	8.78		7.228	101.1	34
10/11/2023 18:09:35	231001_3E9_PER_D7	2.82	3.84	4.47	1.18	1.13	110.1	8.85		7.232	110.1	32.1
10/11/2023 18:11:47	231001_3E9_PER_D7												8.878	7.365	83	18.35	3507	4227	1.67
10/11/2023 18:17:12	231001_3E9_PER_D7												9.148	7.615	83.2	18.35	3626	4356	1.6
10/11/2023 18:22:40	231001_3E9_PER_D7												10.066	8.361	83.1	18.27	3981	4793	1.7
10/11/2023 18:28:04	231001_3E9_PER_D7_SHAKE	2.07	3.9	3.52	1.58	1.3	111.9	8.52		7.396	144.1	8.9
10/11/2023 18:30:11	231001_3E9_PER_D7_SHAKE												10.035	8.752	87.2	19	4167	4778	2.35
10/11/2023 18:35:39	231001_3E9_PER_D7_SHAKE												9.337	8.117	86.9	18.98	3865	4446	2.34
10/11/2023 18:41:09	231001_3E9_PER_D7_SHAKE												9.531	8.367	87.8	18.96	3984	4538	2.32
10/11/2023 18:46:37	231001_3E9_PER_D7_HARV_BOT												0.29	0.168	58	17.82	80	138	1.54
10/11/2023 18:52:10	231001_3E9_PER_D7_HARV_BOT												0.3	0.176	58.7	17.92	84	143	1.63
10/11/2023 18:57:43	231001_3E9_PER_D7_HARV_BOT												0.309	0.193	62.6	17.75	92	147	1.55
10/11/2023 19:03:08	231001_3E9_PER_D7_HARV_LINE												0.466	0.29	62.2	18.03	138	222	1.71
10/11/2023 19:08:37	231001_3E9_PER_D7_HARV_LINE												0.38	0.242	63.5	18.03	115	181	1.52
10/11/2023 19:14:10	231001_3E9_PER_D7_HARV_LINE												0.426	0.271	63.5	17.91	129	203	1.68
10/12/2023 18:47:03	231001_3E9_PER_D8	3.31	3.99	5.06	0.88	1.2	123.8	8.93		7.25	100.1	61.9
10/12/2023 18:50:02	231001_3E9_PER_D8	3.23	3.93	5.06	0.89	1.24	124.5	8.95		7.291	117.3	43.3
10/12/2023 18:52:10	231001_3E9_PER_D8												8.212	6.8	82.8	18.13	3173	3832	1.73
10/12/2023 18:57:36	231001_3E9_PER_D8												8.006	6.534	81.6	18.14	3111	3812	1.71
10/12/2023 19:03:08	231001_3E9_PER_D8												8.493	6.941	81.7	18.04	3305	4044	1.73
10/12/2023 19:08:33	231001_3E9_PER_D8_SHAKE	2.89	3.91	4.66	1.25	1.58	127.1	8.28		7.416	105.4	25.3
10/12/2023 19:10:40	231001_3E9_PER_D8_SHAKE												9.384	8.348	89	18.96	3975	4468	2.37
10/12/2023 19:16:11	231001_3E9_PER_D8_SHAKE												10.974	9.707	88.5	19.01	4622	5225	2.41
10/12/2023 19:21:37	231001_3E9_PER_D8_SHAKE												10.264	9.176	89.4	19.12	4369	4887	2.51
10/12/2023 19:27:06	231001_3E9_PER_D8_HARV_BOT												0.296	0.176	59.6	17.96	84	141	1.71
10/12/2023 19:32:42	231001_3E9_PER_D8_HARV_BOT												0.296	0.166	56	18.53	79	141	1.73
10/12/2023 19:38:10	231001_3E9_PER_D8_HARV_BOT												0.284	0.17	60	18.02	81	135	1.51
10/12/2023 19:43:35	231001_3E9_PER_D8_HARV_LINE												0.237	0.168	70.8	17.37	80	113	1.8
10/12/2023 19:49:04	231001_3E9_PER_D8_HARV_LINE												0.302	0.214	70.8	17.52	102	144	2.58
10/12/2023 19:54:43	231001_3E9_PER_D8_HARV_LINE												0.233	0.124	53.2	18.1	59	111	1.92
10/13/2023 20:12:42	231001_3E9_PER_D9	3.33	4.07	5.43	0.73	1.21	115	9.24		7.284	112	50.6
10/13/2023 20:15:17	231001_3E9_PER_D9	3.21	3.99	5.44	0.73	1.24	114.8	9.22		7.306	124.9	46.3
10/13/2023 20:17:24	231001_3E9_PER_D9												6.193	5.198	83.9	16.97	2475	2949	1.74
10/13/2023 20:22:56	231001_3E9_PER_D9												5.834	4.925	84.4	17.01	2345	2778	1.75
10/13/2023 20:28:21	231001_3E9_PER_D9												5.983	5.038	84.2	17.06	2399	2849	1.79
10/13/2023 20:33:52	231001_3E9_PER_D9_SHAKE	2.77	4.35	4.54	1.5	1.5	111.4	9.15		7.345	135.1	17.2
10/13/2023 20:35:59	231001_3E9_PER_D9_SHAKE												9.543	8.447	88.5	18.43	4022	4544	2.74
10/13/2023 20:41:24	231001_3E9_PER_D9_SHAKE												9.949	8.941	89.9	18.44	4257	4737	2.72
10/13/2023 20:47:00	231001_3E9_PER_D9_SHAKE												9.747	8.739	89.7	18.38	4161	4641	2.85
10/13/2023 20:52:27	231001_3E9_PER_D9_HARV_BOT												0.126	0.055	43.3	16.51	26	60	2.4
10/13/2023 20:58:00	231001_3E9_PER_D9_HARV_BOT												0.097	0.055	56.5	16.71	26	46	1.63
10/13/2023 21:03:27	231001_3E9_PER_D9_HARV_BOT												0.101	0.053	52.1	17.12	25	48	1.37
10/13/2023 21:08:59	231001_3E9_PER_D9_HARV_LINE												0.099	0.069	70.2	16.65	33	47	1.58
10/13/2023 21:14:26	231001_3E9_PER_D9_HARV_LINE												0.151	0.097	63.9	16.16	46	72	1.41
10/13/2023 21:20:06	231001_3E9_PER_D9_HARV_LINE												0.109	0.084	76.9	16.86	40	52	1.74

## Sheet: Run 3 Process Data
Date & Time	Sample ID	pH	PO2	PCO2	Gln	Glu	Gluc	Lac	NH4+	Na+	K+	Ca++	Total Density	Viable Density	Viability	Avg. Live Diameter	Total Live Count	Total Cell Count	Live Cell Std. Deviation
8/16/2023 16:20:03	230816_3E9_BAT_D0	7.535	96.3	47.1	4.22	3.26	6.36	0.49	0.71	110.6	9.06	0.12
8/16/2023 16:22:42	230816_3E9_BAT_D0	7.538	120.9	46.3	4.35	2.65	6.27	0.43	0.73	105.9	8.79	0.11
8/16/2023 16:25:14	230816_3E9_BAT_D0												0.515	0.504	98	19.06	240	245	3.23
8/16/2023 16:30:47	230816_3E9_BAT_D0												0.483	0.47	97.4	19.01	224	230	2.52
8/16/2023 16:36:13	230816_3E9_BAT_D0												0.51	0.494	96.7	19.41	235	243	2.96
8/17/2023 10:18:02	230816_3E9_BAT_D1	7.339	102.8	54.5	3.42	3.18	5.8	0.89	1.21	111.2	9.05	0.12
8/17/2023 10:20:57	230816_3E9_BAT_D1	7.384	123.1	50.3	3.39	3.09	5.79	0.88	1.23	111	9.04	0.12
8/17/2023 10:23:04	230816_3E9_BAT_D1												0.769	0.746	97	19.41	355	366	2.96
8/17/2023 10:28:31	230816_3E9_BAT_D1												0.708	0.699	98.8	20	333	337	2.37
8/17/2023 10:33:59	230816_3E9_BAT_D1												0.687	0.674	98.2	19.94	321	327	2.73
8/18/2023 13:19:35	230816_3E9_BAT_D2				2.39	3.21	4.37	2.02	1.58	110	8.84	0.13
8/18/2023 13:22:31	230816_3E9_BAT_D2	7.352	109.8	17.3			4.33	2.09	1.67	113.1	9.01	0.13
8/18/2023 13:24:37	230816_3E9_BAT_D2												1.363	1.323	97.1	19.89	630	649	3.21
8/18/2023 13:30:09	230816_3E9_BAT_D2												1.575	1.523	96.7	19.9	725	750	3.34
8/18/2023 13:38:54	230816_3E9_BAT_D2												1.401	1.357	96.9	20.04	646	667	3.34
8/18/2023 13:44:21	230816_3E9_BAT_D2	7.437	145.3	15.9	2.43	3.32	4.47	2.17	1.58	113.5	9.01	0.13
8/19/2023 16:24:58	230816_3E9_BAT_D3	7.34	137.7	10.7	1.62	3.26	3.5	2.41	1.57	110.9	8.6	0.13
8/19/2023 16:27:04	230816_3E9_BAT_D3												2.377	2.266	95.3	19.09	1079	1132	3.47
8/19/2023 16:32:34	230816_3E9_BAT_D3												1.861	1.787	96	19.02	851	886	3.63
8/19/2023 16:38:03	230816_3E9_BAT_D3												2.203	2.133	96.8	19.38	975	1007	3.46
8/19/2023 16:43:29	230816_3E9_BAT_D3	7.384	161.2	9.5	1.62	3.24	3.51	2.42	1.57	111.7	8.64	0.13
8/19/2023 21:31:03	230816_3E9_PER_D0_HARV_BOT												0.013	0.004	33.3	15.89	2	6
8/19/2023 21:36:07	230816_3E9_PER_D0_HARV_BOT												0.013	0.011	83.3	18.21	5	6	1.73
8/19/2023 21:41:07	230816_3E9_PER_D0_HARV_BOT												0.013	0.002	16.7	15.35	1	6	âˆž
8/20/2023 14:35:54	230816_3E9_PER_D1												4.488	3.734	83.2	18.53	1778	2137	1.82
8/20/2023 14:41:23	230816_3E9_PER_D1												4.866	3.946	81.1	18.72	1879	2317	1.71
8/20/2023 14:46:56	230816_3E9_PER_D1												5.166	4.305	83.3	18.67	2050	2460	1.82
8/20/2023 14:52:24	230816_3E9_PER_D1_HARV_BOT												0.023	0.017	72.7	18.15	8	11	1.5
8/20/2023 14:57:48	230816_3E9_PER_D1_HARV_BOT												0.011	0.008	80	21.3	4	5	1.84
8/20/2023 15:03:17	230816_3E9_PER_D1_HARV_BOT												0.023	0.017	72.7	17.05	8	11	1.17
8/21/2023 12:59:09	230816_3E9_PER_D2	7.332	91.9	20.6	1.85	4.04	3.9	1.68	0.87	108.7	8.52	0.15
8/21/2023 13:02:25	230816_3E9_PER_D2	7.328	101.5	20	1.8	3.99	3.86	1.69	0.89	109.4	8.56	0.14
8/21/2023 13:04:29	230816_3E9_PER_D2												6.25	5.337	85.4	18.92	2541	2976	1.81
8/21/2023 13:09:54	230816_3E9_PER_D2												7.025	6.067	86.4	19.05	2889	3345	1.75
8/21/2023 13:15:21	230816_3E9_PER_D2												6.677	5.677	85	19.11	2703	3179	1.86
8/21/2023 13:20:45	230816_3E9_PER_D2_HARV_BOT												0.036	0.013	35.3	17.58	6	17	2.32
8/21/2023 13:26:20	230816_3E9_PER_D2_HARV_BOT												0.057	0.021	37	18.12	10	27	1.48
8/21/2023 13:31:43	230816_3E9_PER_D2_HARV_BOT												0.038	0.019	50	17.31	9	18	4.34
8/22/2023 11:02:04	230816_3E9_PER_D3	7.312	93.7	18.3	1.73	3.97	3.63	1.77	0.86	109.1	8.33	0.15
8/22/2023 11:04:37	230816_3E9_PER_D3	7.295	101.6	17.6	1.66	3.89	3.57	1.76	0.93	109.3	8.35	0.14
8/22/2023 11:06:42	230816_3E9_PER_D3												8.674	7.548	87	18.94	3594	4130	1.9
8/22/2023 11:12:16	230816_3E9_PER_D3												9.062	7.89	87.1	19.03	3757	4315	1.95
8/22/2023 11:17:40	230816_3E9_PER_D3												9.688	8.405	86.8	19	4002	4613	2.03
8/22/2023 11:24:11	230816_3E9_PER_D3_HARV_BOT												0.084	0.042	50	18.33	20	40	1.91
8/22/2023 11:29:42	230816_3E9_PER_D3_HARV_BOT												0.105	0.061	58	18.73	29	50	1.49
8/22/2023 11:35:09	230816_3E9_PER_D3_HARV_BOT												0.078	0.046	59.5	18.47	22	37	1.63
8/22/2023 21:14:43	230816_3E9_PER_D3_LATE												11.337	10.007	88.3	18.79	4765	5398	2.08
8/22/2023 21:20:10	230816_3E9_PER_D3_LATE												10.644	9.392	88.2	18.83	4472	5068	1.89
8/22/2023 21:25:44	230816_3E9_PER_D3_LATE												10.663	9.495	89	18.84	4521	5077	1.9
8/22/2023 21:31:11	230816_3E9_PER_D3_HARV_BOTLATE												0.183	0.099	54	18.13	47	87	2.03
8/22/2023 21:36:41	230816_3E9_PER_D3_HARV_BOTLATE												0.216	0.088	40.8	18.43	42	103	2.12
8/22/2023 21:42:08	230816_3E9_PER_D3_HARV_BOTLATE												0.166	0.078	46.8	17.06	37	79	1.91
8/23/2023 10:51:57	230816_3E9_PER_D4	7.242	90.5	14.1	1.54	3.89	3.26	1.92	0.9	111.4	8.26	0.15
8/23/2023 10:54:21	230816_3E9_PER_D4	7.238	93.9	13.7	1.51	3.82	3.22	1.91	0.95	109.1	8.2	0.14
8/23/2023 10:56:26	230816_3E9_PER_D4												12.154	10.732	88.3	18.56	5110	5787	1.99
8/23/2023 11:01:53	230816_3E9_PER_D4												13.679	11.963	87.5	18.7	5582	6383	2.05
8/23/2023 11:07:24	230816_3E9_PER_D4												13.504	11.988	88.8	18.82	5708	6430	2.01
8/23/2023 11:12:54	230816_3E9_PER_D4_HARV_BOT												0.349	0.191	54.8	17.97	91	166	1.82
8/23/2023 11:18:32	230816_3E9_PER_D4_HARV_BOT												0.227	0.105	46.3	17.56	50	108	1.59
8/23/2023 11:24:02	230816_3E9_PER_D4_HARV_BOT												0.269	0.109	40.6	17.68	52	128	2.15
8/23/2023 14:57:05	230816_3E9_PER_D4_2	7.26	84.6	14	1.5	3.88	3.19	1.91	0.93	109.2	8.05	0.14
8/23/2023 15:00:00	230816_3E9_PER_D4_2												13.889	12.416	89.4	18.49	5912	6613	1.87
8/23/2023 15:05:29	230816_3E9_PER_D4_2												14.38	13.002	90.4	18.37	6191	6847	1.95
8/23/2023 15:11:02	230816_3E9_PER_D4_2												14.08	12.605	89.5	18.57	6002	6704	1.92
8/23/2023 16:37:25	230816_3E9_PER_D4_HARV_BOT_2												0.225	0.105	46.7	17.7	50	107	1.43
8/23/2023 16:43:00	230816_3E9_PER_D4_HARV_BOT_2												0.229	0.086	37.6	17.1	41	109	1.32
8/23/2023 16:48:31	230816_3E9_PER_D4_HARV_BOT_2												0.221	0.113	51.4	17.69	54	105	1.74
8/23/2023 18:50:32	230816_3E9_PER_D4_3												13.24	11.984	90.5	18.5	5706	6304	1.97
8/23/2023 18:56:12	230816_3E9_PER_D4_3												13.781	12.343	89.6	18.6	5877	6562	1.89
8/23/2023 19:01:44	230816_3E9_PER_D4_3												13.836	12.362	89.3	18.75	5886	6588	1.88
8/24/2023 11:09:05	230816_3E9_PER_D5	7.344	89.8	33.7	2.17	3.86	4.05	1.22	1.09	110.6	8.75	0.14
8/24/2023 11:13:14	230816_3E9_PER_D5				2.22	3.94	4.17	1.27	1.12	114.4	9.16	0.14
8/24/2023 11:16:01	230816_3E9_PER_D5												14.05	12.185	86.7	18.05	5802	6690	1.71
8/24/2023 11:21:34	230816_3E9_PER_D5												16.05	14.269	88.9	18.35	6794	7642	1.83
8/24/2023 11:27:11	230816_3E9_PER_D5												15.716	13.964	88.9	18.34	6649	7483	1.74
8/24/2023 11:32:44	230816_3E9_PER_D5_HARV_BOT												0.42	0.237	56.5	17.76	113	200	1.73
8/24/2023 11:38:19	230816_3E9_PER_D5_HARV_BOT												0.401	0.235	58.6	17.78	112	191	1.47
8/24/2023 11:43:46	230816_3E9_PER_D5_HARV_BOT												0.456	0.252	55.3	17.39	120	217	1.64
8/24/2023 12:08:33	230816_3E9_PER_D5_HARV_LINE												0.819	0.536	65.4	17.82	255	390	1.96
8/24/2023 12:14:05	230816_3E9_PER_D5_HARV_LINE												0.851	0.59	69.4	17.85	281	405	1.89
8/24/2023 12:19:33	230816_3E9_PER_D5_HARV_LINE												0.8	0.552	69	17.74	263	381	1.83
8/25/2023 12:39:01	230816_3E9_PER_D6	7.348	96.8	41.5	2.7	4.01	4.41	1.07	1.22	116.2	8.93	0.14
8/25/2023 12:42:01	230816_3E9_PER_D6	7.37	107.7	38.2	2.68	3.96	4.43	1.08	1.25	114.9	8.95	0.14
8/25/2023 12:44:08	230816_3E9_PER_D6												13.816	12.052	87.2	18.05	5050	5789	1.79
8/25/2023 12:49:36	230816_3E9_PER_D6												12.505	10.81	86.4	17.85	5147	5954	1.84
8/25/2023 12:55:07	230816_3E9_PER_D6												13.154	11.725	89.1	18.14	5583	6263	1.77
8/25/2023 13:01:12	230816_3E9_PER_D6_HARV_BOT												0.311	0.183	58.8	17.59	87	148	1.8
8/25/2023 13:06:48	230816_3E9_PER_D6_HARV_BOT												0.336	0.208	61.9	18.24	99	160	1.55
8/25/2023 13:12:16	230816_3E9_PER_D6_HARV_BOT												0.342	0.204	59.5	17.91	97	163	1.86
8/25/2023 13:35:05	230816_3E9_PER_D6_HARV_LINE												0.29	0.168	58	17.6	80	138	2.07
8/25/2023 13:40:36	230816_3E9_PER_D6_HARV_LINE												0.229	0.145	63.3	17.5	69	109	1.54
8/25/2023 13:46:12	230816_3E9_PER_D6_HARV_LINE												0.292	0.179	61.2	18.13	85	139	1.77
8/25/2023 14:44:10	230816_3E9_PER_D6_2												12.492	11.108	88.9	18.08	5289	5948	1.77
8/25/2023 14:49:38	230816_3E9_PER_D6_2												13.044	11.74	90	18.36	5590	6211	1.79
8/25/2023 14:55:11	230816_3E9_PER_D6_2												13.004	11.448	88	18.33	5451	6192	1.76
8/26/2023 14:41:10	230816_3E9_PER_D7	7.346	99.8	38.2	3.06	4.25	4.64	1.21	1.18	110.5	9.22	0.13
8/26/2023 14:46:44	230816_3E9_PER_D7	7.356	104.4	35.6	3.04	4.21	4.65	1.22	1.21	111.5	9.28	0.13
8/26/2023 14:48:50	230816_3E9_PER_D7												10.228	9.094	88.9	16.93	4330	4870	1.91
8/26/2023 14:54:22	230816_3E9_PER_D7												10.759	9.613	89.3	16.99	4577	5123	1.96
8/26/2023 14:59:52	230816_3E9_PER_D7												10.845	9.682	89.3	16.98	4610	5164	1.86
8/26/2023 15:05:24	230816_3E9_PER_D7_HARV_BOT												0.206	0.151	73.5	16.42	72	98	2.05
8/26/2023 15:11:01	230816_3E9_PER_D7_HARV_BOT												0.185	0.139	75	16.83	66	88	2.04
8/26/2023 15:16:35	230816_3E9_PER_D7_HARV_BOT												0.206	0.143	69.4	16.72	68	98	2.46
8/26/2023 15:41:44	230816_3E9_PER_D7_HARV_LINE
8/26/2023 15:41:57	230816_3E9_PER_D7_HARV_LINE
8/26/2023 15:42:10	230816_3E9_PER_D7_HARV_LINE
8/26/2023 15:59:49	230816_3E9_PER_D7_HARV_LINE												0.139	0.09	65.2	16.52	43	66	2.01
8/26/2023 16:07:13	230816_3E9_PER_D7_HARV_LINE												0.162	0.134	83.1	17.29	64	77	1.98
8/26/2023 16:12:38	230816_3E9_PER_D7_HARV_LINE												0.166	0.086	51.9	16.86	41	79	1.44
8/27/2023 15:49:15	230816_3E9_PER_D8	7.366	106.1	31.8	3.14	4.4	4.67	1.33	1.23	110.5	9.3	0.13
8/27/2023 15:51:36	230816_3E9_PER_D8	7.367	121.2	30.1	3.08	4.3	4.64	1.34	1.26	109.7	9.28	0.13
8/27/2023 15:53:43	230816_3E9_PER_D8												8.722	7.22	82.8	16.84	3438	4153	2.1
8/27/2023 15:59:06	230816_3E9_PER_D8												8.85	7.458	84.3	16.99	3551	4214	2.05
8/27/2023 16:06:30	230816_3E9_PER_D8												9.13	7.645	83.7	17.09	3640	4347	2.08
8/27/2023 16:11:53	230816_3E9_PER_D8_HARV_BOT												0.166	0.101	60.8	17.02	48	79	1.47
8/27/2023 16:17:21	230816_3E9_PER_D8_HARV_BOT												0.145	0.092	63.8	16.75	44	69	1.6
8/27/2023 16:22:49	230816_3E9_PER_D8_HARV_BOT												0.2	0.132	66.3	17.28	63	95	1.7
8/27/2023 16:45:29	230816_3E9_PER_D8_HARV_LINE												0.25	0.166	66.4	16.85	79	119	1.75
8/27/2023 16:50:56	230816_3E9_PER_D8_HARV_LINE												0.189	0.139	73.3	17.09	66	90	2.06
8/27/2023 16:56:20	230816_3E9_PER_D8_HARV_LINE												0.147	0.099	67.1	16.38	47	70	1.98
8/28/2023 18:33:35	230816_3E9_PER_D9	7.357	132.2	42.1	3.26	4.41	5.08	1.12	1.12	110.9	9.2	0.13
8/28/2023 18:36:24	230816_3E9_PER_D9	7.381	146.9	37.7	3.24	4.31	5.08	1.11	1.18	110.3	9.19	0.13
8/28/2023 18:38:30	230816_3E9_PER_D9												6.712	4.545	67.7	16.41	2164	3196	2.36
8/28/2023 18:44:05	230816_3E9_PER_D9												6.588	4.518	68.6	16.35	2151	3137	2.34
8/28/2023 18:49:29	230816_3E9_PER_D9												6.559	4.509	68.7	16.26	2147	3123	2.21
8/28/2023 18:54:58	230816_3E9_PER_D9_HARV_BOT												0.179	0.122	68.2	16.62	58	85	1.67
8/28/2023 19:00:30	230816_3E9_PER_D9_HARV_BOT												0.16	0.111	69.7	16.71	53	76	1.68
8/28/2023 19:05:58	230816_3E9_PER_D9_HARV_BOT												0.187	0.122	65.2	16.75	58	89	2.08
8/28/2023 19:28:37	230816_3E9_PER_D9_HARV_LINE												0.147	0.082	55.7	15.65	39	70	1.56
8/28/2023 19:34:02	230816_3E9_PER_D9_HARV_LINE												0.153	0.076	49.3	16.38	36	73	1.75
8/28/2023 19:39:35	230816_3E9_PER_D9_HARV_LINE												0.168	0.076	45	16.35	36	80	1.89
8/29/2023 21:50:25	230816_3E9_PER_D10	7.433	118.3	47	3.45	4.27	5.57	0.8	1.01	111.8	9.17	0.13
8/29/2023 21:53:24	230816_3E9_PER_D10	7.44	139.5	43.2	3.35	4.19	5.51	0.81	1.07	109.8	9	0.13
8/29/2023 21:55:31	230816_3E9_PER_D10												4.814	2.237	46.5	16.57	1065	2292	2.47
8/29/2023 22:02:58	230816_3E9_PER_D10												4.641	2.285	49.2	16.62	1088	2210	2.61
8/29/2023 22:08:24	230816_3E9_PER_D10												5.11	2.533	49.6	16.76	1206	2433	2.68
8/29/2023 22:13:53	230816_3E9_PER_D10_HARV_BOT												0.227	0.101	44.4	16.93	48	108	2.42
8/29/2023 22:19:19	230816_3E9_PER_D10_HARV_BOT												0.227	0.08	35.2	16.51	38	108	2.72
8/29/2023 22:24:56	230816_3E9_PER_D10_HARV_BOT												0.191	0.084	44	16.3	40	91	1.83
8/29/2023 22:53:02	230816_3E9_PER_D10_HARV_LINE												0.225	0.084	37.4	15.8	40	107	2.24
8/29/2023 22:58:35	230816_3E9_PER_D10_HARV_LINE												0.269	0.08	29.7	15.66	38	128	2.46
8/29/2023 23:04:01	230816_3E9_PER_D10_HARV_LINE												0.189	0.078	41.1	15.45	37	90	3.13
8/30/2023 19:14:30	230816_3E9_PER_D11	7.451	140.4	51.1	3.56	4.21	5.83	0.62	0.93	110.5	8.99	0.13
8/30/2023 19:17:02	230816_3E9_PER_D11	7.468	154.7	46.1	3.48	4.18	5.82	0.63	1	111	9.01	0.13
8/30/2023 19:19:08	230816_3E9_PER_D11												3.982	1.518	38.1	16.29	723	1896	2.56
8/30/2023 19:24:39	230816_3E9_PER_D11												3.999	1.563	39.1	16.27	744	1904	2.84
8/30/2023 19:30:07	230816_3E9_PER_D11												4.003	1.602	40	16.23	763	1906	2.7
8/30/2023 19:35:42	230816_3E9_PER_D11_HARV_BOT												0.206	0.076	36.7	15.64	36	98	2.11
8/30/2023 19:41:16	230816_3E9_PER_D11_HARV_BOT												0.187	0.053	28.1	16.04	25	89	2.64
8/30/2023 19:46:45	230816_3E9_PER_D11_HARV_BOT												0.145	0.034	23.2	17.48	16	69	2.75
8/30/2023 19:52:17	230816_3E9_PER_D11_HARV_LINE												0.158	0.038	24	15.69	18	75	2.17
8/30/2023 19:57:47	230816_3E9_PER_D11_HARV_LINE												0.151	0.05	33.3	14.37	24	72	0.88
8/30/2023 20:05:16	230816_3E9_PER_D11_HARV_LINE												0.137	0.04	29.2	14.7	19	65	1.08

## Sheet: Run 4 Process Data
Date & Time	Sample ID	Gln	Glu	Gluc	Lac	NH4+	Na+	K+	Ca++	pH	PO2	PCO2	Total Density	Viable Density	Viability	Avg. Live Diameter	Total Live Count	Total Cell Count	Live Cell Std. Deviation
6/4/2024 15:45:36	240604_3E9_BAT_D0	4.16	3.69	6.35	0.01	0.56	108.2	8.85	0.13	7.461	153.9	61.9
6/4/2024 15:48:11	240604_3E9_BAT_D0	4.07	3.57	6.33	0.02	0.59	109.2	8.92	0.13	7.519	162.4	54
6/4/2024 15:50:15	240604_3E9_BAT_D0												0.693	0.603	87	18.25	287	330	2.66
6/4/2024 15:55:48	240604_3E9_BAT_D0												0.626	0.55	87.9	18.06	262	298	2.05
6/4/2024 16:03:21	240604_3E9_BAT_D0												0.676	0.561	82.9	18.25	267	322	2.33
6/5/2024 18:03:46	240604_3E9_BAT_D1	3.45	3.64	5.65	0.59	1.15	109.8	8.98	0.14	7.219	93.7	78.8
6/5/2024 18:06:45	240604_3E9_BAT_D1	3.42	3.54	5.62	0.6	1.17	109.5	8.96	0.13	7.275	117.6	70.5
6/5/2024 18:08:50	240604_3E9_BAT_D1												1.046	0.876	83.7	19.64	417	498	2.41
6/5/2024 18:14:25	240604_3E9_BAT_D1												0.918	0.764	83.3	19.21	364	437	2.42
6/5/2024 18:19:57	240604_3E9_BAT_D1												1.174	0.909	77.5	19.77	433	559	2.01
6/6/2024 13:10:38	240604_3E9_BAT_D2	2.9	3.69	4.85	1.22	1.47	107.8	8.81	0.13	7.198	79.2	53.4
6/6/2024 13:12:56	240604_3E9_BAT_D2	2.82	3.51	4.8	1.22	1.51	108.8	8.88	0.13	7.245	102.9	47
6/6/2024 13:15:08	240604_3E9_BAT_D2												1.644	1.378	83.8	19.44	656	783	2.48
6/6/2024 13:20:39	240604_3E9_BAT_D2												1.699	1.342	79	19.83	639	809	2.51
6/6/2024 13:26:13	240604_3E9_BAT_D2												1.647	1.266	76.9	19.7	603	784	2.32
6/7/2024 18:48:10	240604_3E9_BAT_D3	1.97	3.66	3.73	1.85	1.72	108.2	8.72	0.13	7.176	79.3	23.9
6/7/2024 18:50:26	240604_3E9_BAT_D3	1.89	3.48	3.69	1.84	1.76	107.7	8.69	0.13	7.211	104.1	21.7
6/7/2024 18:52:30	240604_3E9_BAT_D3												3.129	2.436	77.9	19.36	1160	1490	2.6
6/7/2024 18:57:59	240604_3E9_BAT_D3												3.01	2.419	80.4	19.29	1152	1433	2.74
6/7/2024 19:03:23	240604_3E9_BAT_D3												3.402	2.669	78.5	19.44	1271	1620	2.69
6/8/2024 16:25:49	240604_3E9_PER_D1	2.29	3.67	3.87	1.63	1.37	106.9	8.53	0.13	7.213	93.5	27.3
6/8/2024 16:28:45	240604_3E9_PER_D1	2.23	3.51	3.86	1.63	1.4	107.1	8.52	0.13	7.254	113.2	24.6
6/8/2024 16:30:49	240604_3E9_PER_D1												5.305	3.766	71	19.1	1793	2526	2.07
6/8/2024 16:36:14	240604_3E9_PER_D1												4.78	3.31	69.2	19.2	1576	2276	1.9
6/8/2024 16:41:44	240604_3E9_PER_D1												4.56	3.249	71.3	19.12	1547	2171	2.03
6/8/2024 16:47:13	240604_3E9_PER_D1_HARV_BOT												0.002	0	0		0	1
6/8/2024 16:52:48	240604_3E9_PER_D1_HARV_BOT												0.002	0	0		0	1
6/8/2024 16:58:16	240604_3E9_PER_D1_HARV_BOT												0.002	0	0		0	1
6/9/2024 18:18:58	240604_3E9_PER_D2	2.28	3.7	3.76	1.6	1.35	106.5	8.42	0.13	7.287	86.2	21.7
6/9/2024 18:21:15	240604_3E9_PER_D2	2.22	3.54	3.74	1.6	1.39	106.3	8.42	0.12	7.307	102.5	19.9
6/9/2024 18:23:24	240604_3E9_PER_D2												6.635	4.896	73.8	18.66	2331	3159	1.89
6/9/2024 18:28:56	240604_3E9_PER_D2												6.082	4.671	76.8	18.44	2224	2896	1.99
6/9/2024 18:34:27	240604_3E9_PER_D2												6.912	4.996	72.3	18.77	2379	3291	1.97
6/9/2024 18:39:59	240604_3E9_PER_D2_HARV_BOT												0.011	0	0		0	5
6/9/2024 18:45:39	240604_3E9_PER_D2_HARV_BOT												0	0			0	0
6/9/2024 18:51:06	240604_3E9_PER_D2_HARV_BOT												0.021	0	0		0	10
6/10/2024 14:57:31	240604_3E9_PER_D3	2.44	3.78	3.5	1.85	1.02	107	8.45	0.14	7.338	95.6	13
6/10/2024 14:59:46	240604_3E9_PER_D3	2.29	3.79	3.52	1.86	1.03	108.9	8.55	0.13	7.347	98.2	12.7
6/10/2024 15:01:51	240604_3E9_PER_D3												7.414	5.612	75.7	18.21	2672	3530	2.15
6/10/2024 15:07:25	240604_3E9_PER_D3												7.67	5.916	77.1	18.34	2817	3652	2.3
6/10/2024 15:12:59	240604_3E9_PER_D3												8.432	6.471	76.7	18.36	3081	4015	2.17
6/10/2024 15:18:31	240604_3E9_PER_D3_HARV_BOT												0.017	0.002	12.5	16.98	1	8	âˆž
6/10/2024 15:24:06	240604_3E9_PER_D3_HARV_BOT												0.025	0	0		0	12
6/10/2024 15:29:38	240604_3E9_PER_D3_HARV_BOT												0.025	0.002	8.3	13.78	1	12	âˆž
6/11/2024 18:15:25	240604_3E9_PER_D4	1.95	3.68	2.73	2.39	0.84	117.5	8.14	0.13	7.488	87	20.2
6/11/2024 18:17:45	240604_3E9_PER_D4	1.85	3.66	2.71	2.38	0.84	117.9	8.12	0.12	7.5	96.2	19.2
6/11/2024 18:19:49	240604_3E9_PER_D4												11.772	8.913	75.7	18.67	4244	5605	1.96
6/11/2024 18:25:18	240604_3E9_PER_D4												11.971	9.174	76.6	18.68	4368	5700	2.02
6/11/2024 18:30:56	240604_3E9_PER_D4												11.553	8.884	76.9	18.54	4230	5501	2.08
6/11/2024 18:36:25	240604_3E9_PER_D4_HARV_BOT												0.109	0.021	19.2	17.96	10	52	1.16
6/11/2024 18:42:07	240604_3E9_PER_D4_HARV_BOT												0.12	0.032	26.3	17.33	15	57	1.74
6/11/2024 18:47:41	240604_3E9_PER_D4_HARV_BOT												0.084	0.011	12.5	15.12	5	40	3.44
6/12/2024 12:02:47	240604_3E9_PER_D5	2.04	3.71	3.05	2.08	0.84	111.9	8.22	0.14	7.241	84.2	26.5
6/12/2024 12:05:02	240604_3E9_PER_D5	2.04	3.64	3.03	2.08	0.86	112.6	8.27	0.13	7.274	87.9	24.5
6/12/2024 12:07:07	240604_3E9_PER_D5												11.723	8.995	76.7	18.61	4283	5582	1.87
6/12/2024 12:12:41	240604_3E9_PER_D5												12.194	9.285	76.1	18.69	4421	5806	1.91
6/12/2024 12:18:09	240604_3E9_PER_D5												12.049	9.327	77.4	18.47	4441	5737	1.97
6/12/2024 12:23:48	240604_3E9_PER_D5_HARV_BOT												0.281	0.084	29.9	17.28	40	134	2.19
6/12/2024 12:35:07	240604_3E9_PER_D5_HARV_BOT												0.271	0.076	27.9	17.64	36	129	2.64
6/12/2024 13:33:53	240604_3E9_PER_D5	2.2	3.67	3.13	2.03	0.84	110.5	8.22	0.14	7.243	79.3	27.2
6/12/2024 13:36:12	240604_3E9_PER_D5	2.09	3.63	3.1	2.01	0.86	111.3	8.23	0.13	7.272	83.9	25.3
6/12/2024 13:38:17	240604_3E9_PER_D5												13.08	10.186	77.9	18.25	4850	6228	2.03
6/12/2024 13:43:46	240604_3E9_PER_D5												14.512	11.496	79.2	18.5	5474	6910	1.96
6/12/2024 13:49:20	240604_3E9_PER_D5												13.926	10.856	78	18.44	5169	6631	2.02
6/13/2024 9:05:49	240604_3E9_PER_D6	1.98	3.74	2.89	2.1	0.94	109.7	8.18	0.14	7.212	80.2	22
6/13/2024 9:08:56	240604_3E9_PER_D6	1.91	3.65	2.88	2.06	0.95	108.6	8.07	0.13	7.257	78.6	19.7
6/13/2024 9:11:01	240604_3E9_PER_D6												16.678	13.019	78.1	18.53	6199	7941	1.85
6/13/2024 9:16:41	240604_3E9_PER_D6												17.621	13.878	78.8	18.46	6608	8390	1.85
6/13/2024 9:22:11	240604_3E9_PER_D6												17.062	13.521	79.2	18.3	6438	8124	1.9
6/13/2024 9:27:46	240604_3E9_PER_D6_HARV_BOT												0.414	0.141	34	16.24	67	197	2.05
6/13/2024 9:33:30	240604_3E9_PER_D6_HARV_BOT												0.351	0.084	24	16.54	40	167	1.39
6/14/2024 14:14:16	240604_3E9_PER_D7	1.79	3.66	2.67	1.99	1.06	105.8	8.01	0.14	7.07	78.1	21.7
6/14/2024 14:17:08	240604_3E9_PER_D7	1.76	3.56	2.66	1.96	1.06	105.6	7.97	0.13	7.105	65.3	19.4
6/14/2024 14:19:14	240604_3E9_PER_D7												22.214	18.043	81.2	18.61	8591	10577	1.77
6/14/2024 14:24:50	240604_3E9_PER_D7												21.773	17.518	80.5	18.74	8341	10367	1.79
6/14/2024 14:30:19	240604_3E9_PER_D7												23.982	19.553	81.5	18.74	9310	11419	1.83
6/14/2024 14:35:54	240604_3E9_PER_D7_HARV_BOT												0.956	0.305	31.9	17.43	145	455	1.73
6/14/2024 14:41:32	240604_3E9_PER_D7_HARV_BOT												0.903	0.3	33.3	17.82	143	430	1.77
6/14/2024 14:47:07	240604_3E9_PER_D7_HARV_BOT												0.981	0.323	33	17.38	154	467	1.66
6/15/2024 13:31:07	240604_3E9_PER_D8	1.7	3.64	2.27	2.2	1.11	108.8	7.98	0.13	7.067	78.7	24.2
6/15/2024 13:33:59	240604_3E9_PER_D8	1.63	3.56	2.24	2.18	1.13	108.4	7.95	0.13	7.068	69.7	23.6
6/15/2024 13:41:33	240604_3E9_PER_D8												24.795	20.298	81.9	18.57	9665	11806	1.79
6/15/2024 13:47:03	240604_3E9_PER_D8												25.94	21.111	81.4	18.59	10052	12351	1.84
6/15/2024 13:52:37	240604_3E9_PER_D8_HARV_BOT												1.124	0.422	37.6	17.19	201	535	1.75
6/15/2024 13:58:09	240604_3E9_PER_D8_HARV_BOT												1.569	0.622	39.6	17.43	296	747	1.94
6/15/2024 14:05:35	240604_3E9_PER_D8_HARV_BOT												1.607	0.668	41.6	17.69	318	765	1.64
6/15/2024 14:13:42	240604_3E9_PER_D8												22.367	18.207	81.4	18.6	8669	10650	1.72
6/15/2024 14:19:07	240604_3E9_PER_D8												24.904	20.34	81.7	18.67	9685	11858	1.8
6/15/2024 14:24:35	240604_3E9_PER_D8												24.163	19.742	81.7	19.2	9400	11505	1.74
6/16/2024 11:59:09	240604_3E9_PER_D9	1.69	3.61	1.76	2.7	1.12	113	7.85	0.13	7.065	78.2	27.1
6/16/2024 12:03:29	240604_3E9_PER_D9	1.58	3.64	1.74	2.7	1.15	115.2	7.89	0.13	7.094	63.2	24.9
6/16/2024 12:05:34	240604_3E9_PER_D9												25.112	20.868	83.1	18.26	9936	11957	1.79
6/16/2024 12:11:02	240604_3E9_PER_D9												28.397	23.688	83.4	18.61	11279	13521	1.81
6/16/2024 12:16:32	240604_3E9_PER_D9												23.526	19.192	81.6	18.35	9138	11202	1.82
6/16/2024 12:22:01	240604_3E9_PER_D9												26.927	22.394	83.2	18.43	10663	12821	1.82
6/16/2024 12:27:39	240604_3E9_PER_D9												22.708	18.464	81.3	18.44	8440	10380	1.8
6/16/2024 12:33:08	240604_3E9_PER_D9_HARV_BOT												2.283	1.166	51.1	16.93	555	1087	1.85
6/16/2024 12:38:37	240604_3E9_PER_D9_HARV_BOT												2.396	1.176	49.1	17.1	560	1141	1.86
6/16/2024 12:44:06	240604_3E9_PER_D9_HARV_BOT												2.587	1.185	45.8	16.7	564	1232	1.84
6/17/2024 12:59:39	240604_3E9_PER_D10	3.09	3.67	3.07	1.8	1.24	107.5	9.02	0.13	7.142	92.5	39.3
6/17/2024 13:02:12	240604_3E9_PER_D10	3.05	3.59	3.05	1.81	1.27	108.6	9.1	0.13	7.179	103.3	35.1
6/17/2024 13:04:17	240604_3E9_PER_D10												22.964	18.763	81.7	18.43	8934	10934	1.75
6/17/2024 13:09:47	240604_3E9_PER_D10												22.081	17.801	80.6	18.68	8476	10514	1.74
6/17/2024 13:15:13	240604_3E9_PER_D10												21.804	17.511	80.3	18.38	8338	10382	1.76
6/17/2024 13:20:43	240604_3E9_PER_D10_HARV_BOT												2.081	1.086	52.2	17.76	517	991	1.83
6/17/2024 13:26:19	240604_3E9_PER_D10_HARV_BOT												2.067	1.157	56	17.77	551	984	1.91
6/17/2024 13:31:49	240604_3E9_PER_D10_HARV_BOT												1.913	0.958	50.1	17.91	456	911	1.71
6/17/2024 13:37:14	240604_3E9_PER_D10_HARV_LINE												1.109	0.542	48.9	17.6	258	528	1.79
6/17/2024 13:42:44	240604_3E9_PER_D10_HARV_LINE												1.193	0.504	42.3	17.36	240	568	1.58
6/17/2024 13:48:22	240604_3E9_PER_D10_HARV_LINE												1.224	0.536	43.7	17.3	255	583	1.63
6/18/2024 13:07:34	240604_3E9_PER_D11	3.5	3.68	4.01	1.19	1.51	127.4	9.19	0.13
6/18/2024 13:09:48	240604_3E9_PER_D11	3.37	3.54	3.91	1.17	1.52	124.9	9.02	0.12
6/18/2024 13:11:52	240604_3E9_PER_D11												18.551	14.756	79.5	18.56	7026	8833	1.75
6/18/2024 13:23:19	240604_3E9_PER_D11												16.6	13.429	80.9	17.96	6394	7904	1.73
6/18/2024 13:28:50	240604_3E9_PER_D11												16.048	12.763	79.5	18.13	6077	7641	1.73
6/18/2024 13:34:24	240604_3E9_PER_D11_HARV_BOT												0.729	0.344	47.3	18.26	164	347	1.66
6/18/2024 13:39:54	240604_3E9_PER_D11_HARV_BOT												0.748	0.361	48.3	18.29	172	356	1.74
6/18/2024 13:45:27	240604_3E9_PER_D11_HARV_BOT												0.832	0.46	55.3	17.68	219	396	1.61
6/18/2024 13:50:56	240604_3E9_PER_D11_HARV_LINE												0.382	0.231	60.4	17.14	110	182	1.69
6/18/2024 13:56:31	240604_3E9_PER_D11_HARV_LINE												0.378	0.231	61.1	17.02	110	180	1.76
6/18/2024 14:03:58	240604_3E9_PER_D11_HARV_LINE												0.386	0.216	56	17.31	103	184	1.51
6/19/2024 12:28:48	240604_3E9_PER_D12	3.78	3.83	4.51	1.07	1.36	122.8	9.33	0.12	7.153	97.2	63.4
6/19/2024 12:31:35	240604_3E9_PER_D12	3.73	3.76	4.51	1.08	1.38	123	9.34	0.12	7.2	111.9	56.7
6/19/2024 12:39:09	240604_3E9_PER_D12												11.196	7.981	71.3	16.62	3800	5331	1.61
6/19/2024 12:44:46	240604_3E9_PER_D12												9.34	6.851	73.4	16.66	3262	4447	1.63
6/19/2024 12:50:12	240604_3E9_PER_D12_HARV_BOT												0.342	0.17	49.7	16.44	81	163	1.67
6/19/2024 12:55:47	240604_3E9_PER_D12_HARV_BOT												0.328	0.17	51.9	16.86	81	156	1.74
6/19/2024 13:01:13	240604_3E9_PER_D12_HARV_BOT												0.311	0.189	60.8	17.24	90	148	2
6/19/2024 13:06:44	240604_3E9_PER_D12												10.757	7.949	73.9	16.71	3785	5122	1.65
6/19/2024 13:12:11	240604_3E9_PER_D12												8.714	6.301	72.3	16.53	3000	4149	1.61
6/19/2024 13:17:46	240604_3E9_PER_D12												11.765	8.783	74.7	17.05	4182	5602	1.67
6/19/2024 13:23:12	240604_3E9_PER_D12_HARV_LINE												0.179	0.078	43.5	16.06	37	85	1.29
6/19/2024 13:28:43	240604_3E9_PER_D12_HARV_LINE												0.216	0.116	53.4	16.19	55	103	1.5
6/19/2024 13:34:15	240604_3E9_PER_D12_HARV_LINE												0.221	0.097	43.8	16.36	46	105	1.57
6/20/2024 20:19:37	240604_3E9_PER_D13	3.94	3.75	5.2	0.71	1.04	123.8	9.09	0.13	7.221	121.5	73.7
6/20/2024 20:22:24	240604_3E9_PER_D13	3.91	3.68	5.19	0.71	1.06	123.2	9.05	0.12	7.269	136.5	65.5
6/20/2024 20:25:01	240604_3E9_PER_D13												7.531	3.934	52.2	16.04	1873	3586	1.5
6/20/2024 20:30:39	240604_3E9_PER_D13												6.128	3.241	52.9	15.76	1543	2918	1.47
6/20/2024 20:36:11	240604_3E9_PER_D13												7.166	3.808	53.1	15.81	1813	3412	1.47
6/20/2024 20:41:39	240604_3E9_PER_D13_HARV_BOT												0.701	0.239	34.1	16.53	114	334	1.42
6/20/2024 20:47:19	240604_3E9_PER_D13_HARV_BOT												0.632	0.286	45.2	16.53	136	301	1.55
6/20/2024 20:52:47	240604_3E9_PER_D13_HARV_BOT												0.58	0.246	42.4	16.51	117	276	1.57
6/20/2024 20:58:19	240604_3E9_PER_D13_HARV_LINE												0.197	0.067	34	15.62	32	94	0.89
6/20/2024 21:03:53	240604_3E9_PER_D13_HARV_LINE
6/20/2024 21:09:33	240604_3E9_PER_D13_HARV_LINE												0.2	0.074	36.8	15.62	35	95	1.32
6/21/2024 7:41:10	240604_3E9_PER_D14	3.99	3.68	5.4	0.56	0.91	122.3	8.87	0.12
6/21/2024 7:44:33	240604_3E9_PER_D14	3.93	3.56	5.37	0.56	0.96	122.9	8.86	0.12	7.283	150.5	70.4
6/21/2024 7:52:04	240604_3E9_PER_D14												5.62	2.455	43.7	15.58	1169	2676	1.4
6/21/2024 7:58:22	240604_3E9_PER_D14												5.099	2.279	44.7	15.37	1085	2428	1.36
6/21/2024 8:05:51	240604_3E9_PER_D14_HARV_BOT												0.265	0.063	23.8	15.27	30	126	1.16
6/21/2024 8:11:24	240604_3E9_PER_D14_HARV_BOT												0.155	0.057	36.5	14.88	27	74	1.14
6/21/2024 8:16:57	240604_3E9_PER_D14_HARV_BOT												0.155	0.048	31.1	15.33	23	74	1.07
6/21/2024 8:22:36	240604_3E9_PER_D14												5.385	2.539	47.2	15.18	1209	2564	1.4
6/21/2024 8:28:11	240604_3E9_PER_D14												5.28	2.602	49.3	15.39	1239	2514	1.44
6/21/2024 8:33:44	240604_3E9_PER_D14												5.458	2.701	49.5	15.5	1286	2599	1.46
6/21/2024 8:39:21	240604_3E9_PER_D14_HARV_LINE												0.25	0.071	28.6	15.58	34	119	1.34
6/21/2024 8:44:55	240604_3E9_PER_D14_HARV_LINE												0.244	0.069	28.4	15.88	33	116	1.23
6/21/2024 8:50:31	240604_3E9_PER_D14_HARV_LINE												0.263	0.071	27.2	15.36	34	125	0.93

## Sheet: Run 1 Functional Titer Data
Day	Viral Titer	Sample Source
6	1.65257e+07	Bioreactor
7	7.41849e+07	Bioreactor
8	5.72055e+07	Bioreactor
9	1.74988e+07	Bioreactor
10	1.31367e+07	Bioreactor
6	5.91312e+06	Harvest Bottle with SFCA
7	4.83503e+07	Harvest Bottle with SFCA
8	8.74115e+07	Harvest Bottle with SFCA
9	3.80134e+07	Harvest Bottle with SFCA
10	1.51793e+07	Harvest Bottle with SFCA
6	1.51189e+07	Harvest Line
7	1.14289e+08	Harvest Line
8	7.37542e+07	Harvest Line
9	2.87082e+07	Harvest Line
10	1.18068e+07	Harvest Line
6	2.01369e+06	Pseudo-Perfused Shake Flask
7	2.28156e+08	Pseudo-Perfused Shake Flask
8	2.45901e+08	Pseudo-Perfused Shake Flask
9	9.20056e+07	Pseudo-Perfused Shake Flask
10	4.69868e+07	Pseudo-Perfused Shake Flask
8	1.75545e+08	Harvest Bottle with PVDF
9	5.05567e+07	Harvest Bottle with PVDF
10	1.72476e+07	Harvest Bottle with PVDF

## Sheet: Run 2 Functional Titer Data
Day	Viral Titer	Sample Source
7	6.95239e+06	Bioreactor
8	6.92001e+07	Bioreactor
9	7.06008e+07	Bioreactor
7	2.62089e+06	Harvest Bottle
8	5.43044e+07	Harvest Bottle
9	5.60258e+07	Harvest Bottle
7	1.03149e+07	Harvest Line
8	8.02995e+07	Harvest Line
9	7.31534e+07	Harvest Line
7	590718	Pseudo-Perfused Shake Flask
8	4.42e+08	Pseudo-Perfused Shake Flask
9	3.05017e+08	Pseudo-Perfused Shake Flask

## Sheet: Run 3 Functional Titer Data
Day	Viral Titer	Sample Source
5	4.00112e+06	Bioreactor
6	9.99672e+07	Bioreactor
7	5.79818e+07	Bioreactor
8	3.31286e+07	Bioreactor
9	1.44457e+07	Bioreactor
10	6.10256e+06	Bioreactor
11	3.76713e+06	Bioreactor
5	832121	Harvest Bottle
6	3.5645e+07	Harvest Bottle
7	6.36767e+07	Harvest Bottle
8	4.91023e+07	Harvest Bottle
9	2.23398e+07	Harvest Bottle
10	8.44915e+06	Harvest Bottle
11	4.53872e+06	Harvest Bottle
5	4.05763e+06	Harvest Line
6	1.06132e+08	Harvest Line
7	8.7707e+07	Harvest Line
8	3.50977e+07	Harvest Line
9	1.22966e+07	Harvest Line
10	6.44215e+06	Harvest Line
11	3.81772e+06	Harvest Line

## Sheet: Run 4 Functional Titer Data
Day	Viral Titer	Sample Source
10	316971	Bioreactor
11	841428	Bioreactor
12	2.33194e+06	Bioreactor
13	445790	Bioreactor
14	170444	Bioreactor
10	282966	Harvest Bottle
11	1.02143e+06	Harvest Bottle
12	2.73122e+06	Harvest Bottle
13	1.03473e+06	Harvest Bottle
14	366640	Harvest Bottle
10	292229	Harvest Line
11	1.54317e+06	Harvest Line
12	3.50977e+06	Harvest Line
13	570996	Harvest Line
14	331432	Harvest Line

## Sheet: Run 1 Cell-Specific Production
Day	Sample Source	Viable Density in the BR	Functional Titer	Denominator (Average Cell Density)	Numerator (Functional Vectors Differential)	TU/cell/day
5	Perfusion Culture	7.32356
6	Perfusion Culture	8.403	1.65257e+07	7.86328	2.24388e+07	2.85362
7	Perfusion Culture	6.82433	7.41849e+07	7.61367	1.06009e+08	13.9236
8	Perfusion Culture	6.09267	5.72055e+07	6.4585	7.0432e+07	10.9053
9	Perfusion Culture	4.48533	1.74988e+07	5.289	-1.69323e+06	-0.320141
10	Perfusion Culture	3.423	1.31367e+07	3.95417	1.08172e+07	2.73565
5	Harvest Bottle	7.32356
6	Harvest Bottle	8.403	5.91312e+06
7	Harvest Bottle	6.82433	4.83503e+07
8	Harvest Bottle	6.09267	8.74115e+07
9	Harvest Bottle	4.48533	3.80134e+07
10	Harvest Bottle	3.423	1.51793e+07
6	Pseudo-Perfused Shake Flask	8.35367	2.01369e+06	7.83861	2.01369e+06	0.256894
7	Pseudo-Perfused Shake Flask	7.83167	2.28156e+08	8.09267	2.28156e+08	28.1929
8	Pseudo-Perfused Shake Flask	7.752	2.45901e+08	7.79183	2.45901e+08	31.5588
9	Pseudo-Perfused Shake Flask	7.044	9.20056e+07	7.398	9.20056e+07	12.4366
10	Pseudo-Perfused Shake Flask	5.163	4.69868e+07	6.1035	4.69868e+07	7.69834

## Sheet: Run 2 Cell-Specific Production
Day	Sample Source	Viable Density in the BR	Functional Titer	Denominator (Average Cell Density)	Numerator (Functional Vectors Differential)	TU/cell/day
6	Perfusion Culture	7.64317
7	Perfusion Culture	7.78033	6.95239e+06	7.71175	9.57328e+06	1.24139
8	Perfusion Culture	6.75833	6.92001e+07	7.26933	1.16552e+08	16.0334
9	Perfusion Culture	5.05367	7.06008e+07	5.906	5.74265e+07	9.72342
6	Harvest Bottle	7.64317
7	Harvest Bottle	7.78033	2.62089e+06
8	Harvest Bottle	6.75833	5.43044e+07
9	Harvest Bottle	5.05367	5.60258e+07
7	Pseudo-Perfused Shake Flask	8.412	590718	8.02758	590718	0.073586
8	Pseudo-Perfused Shake Flask	9.077	4.42e+08	8.7445	4.42e+08	50.546
9	Pseudo-Perfused Shake Flask	8.709	3.05017e+08	8.893	3.05017e+08	34.2986

[truncated: 2 more sheets: Run 3 Cell-Specific Production, Run 4 Cell-Specific Production]
